# Supplementary material for: Psychometric properties of the Patient-Reported Outcomes Measurement Information System (PROMIS®) pediatric item bank peer relationships in the Dutch general population
Source: PubMed Central journal article supplement (PMC8233291; doi:10.1007/s11136-021-02781-w), 2021-02-19
Supplement: 11136_2021_2781_MOESM1_ESM.pdf [file 11136_2021_2781_MOESM1_ESM.pdf]

## Supplementary Material

Belonging to: Psychometric properties of the Patient-Reported Outcomes Measurement Information System (PROMIS®) Pediatric item bank Peer Relationships in the Dutch general population (Luijten et al., 2021).

### Contents

**Appendix A** – Sociodemographic characteristics of the pediatric and adolescent study samples in comparison to the general population.

**Appendix B** – Assessment of unidimensionality through confirmatory factor analysis and bi-factor analyses.

**Appendix C** – Estimated item parameters and item fit of the pediatric PROMIS Peer Relationships item bank in the Dutch general population (n=527).

**Appendix D** – Raw output of IRTPRO DIF analyses.

Psychometric properties of the Patient-Reported Outcomes Measurement Information System (PROMIS®)  
Pediatric item bank Peer Relationships in the Dutch general population (Luijten et al., 2021).

## **Appendix A – Sociodemographic Characteristics**

**Appendix A.** Sociodemographic characteristics of the pediatric and adolescent study samples in comparison to the general population.

| Pediatric study sample (N=492) | 8 – 12 years |            |                       | Adolescent study sample (N=606)                   | 13 – 18 years |            |                       |
|--------------------------------|--------------|------------|-----------------------|---------------------------------------------------|---------------|------------|-----------------------|
|                                | Sample (N)   | Sample (%) | Dutch Population* (%) |                                                   | Sample (N)    | Sample (%) | Dutch Population* (%) |
| <b>Age (years)</b>             |              |            |                       | <b>Age (years)</b>                                |               |            |                       |
| 8                              | 90           | 18.3       | 19.1                  | 13                                                | 101           | 16.7       | 16.9                  |
| 9                              | 92           | 18.7       | 19.4                  | 14                                                | 106           | 17.5       | 17.2                  |
| 10                             | 98           | 19.9       | 20.0                  | 15                                                | 106           | 17.5       | 16.8                  |
| 11                             | 104          | 21.1       | 20.7                  | 16                                                | 100           | 16.5       | 16.7                  |
| 12                             | 108          | 22.0       | 20.8                  | 17                                                | 86            | 14.2       | 16.2                  |
|                                |              |            |                       | 18                                                | 107           | 17.7       | 16.3                  |
| <b>Gender</b>                  |              |            |                       |                                                   |               |            |                       |
| Male                           | 241          | 51.0       | 51.1                  |                                                   | 316           | 52.1       | 51.1                  |
| Female                         | 251          | 49.0       | 48.9                  |                                                   | 290           | 47.9       | 48.9                  |
| <b>Ethnicity</b>               |              |            |                       |                                                   |               |            |                       |
| Dutch                          | 386          | 78.5       | 76.0                  |                                                   | 510           | 84.2       | 76.3                  |
| Non-western immigrants         | 85           | 17.3       | 17.4                  |                                                   | 63            | 10.4       | 16.9                  |
| Western immigrants             | 21           | 4.3        | 6.6                   |                                                   | 33            | 5.4        | 6.8                   |
|                                |              |            |                       | <b>Educational Level</b>                          |               |            |                       |
|                                |              |            |                       | Elementary <sup>1</sup>                           | 6             | 1.0        | 0.6                   |
|                                |              |            |                       | Lower vocational LBO/VMBO <sup>1</sup>            | 149           | 24.6       | 23.2                  |
|                                |              |            |                       | Lower vocational MAVO <sup>1</sup>                | 189           | 31.2       | 30.1                  |
|                                |              |            |                       | Secondary vocational MBO <sup>2</sup>             | 118           | 19.5       | 20.1                  |
|                                |              |            |                       | General secondary education HAVO/VWO <sup>3</sup> | 129           | 21.3       | 21.8                  |
|                                |              |            |                       | HBO/WO Bachelor <sup>3</sup>                      | 15            | 2.5        | 4.1                   |
|                                |              |            |                       | WO Master or Doctorate <sup>3</sup>               | 0             | 0.0        | 0.2                   |

Note: \* = Based on the Gold Standard 2017 (Statistics Netherlands; [www.cbs.nl/en-gb](http://www.cbs.nl/en-gb)) population numbers; <sup>1</sup>, Low educational level; <sup>2</sup>, Intermediate educational level; <sup>3</sup>, High educational level.

Psychometric properties of the Patient-Reported Outcomes Measurement Information System (PROMIS®)  
Pediatric item bank Peer Relationships in the Dutch general population (Luijten et al., 2021).

## **Appendix B – Unidimensionality Analyses**

**Appendix B.** Assessment of unidimensionality through confirmatory factor analysis (CFA) and bi-factor analyses.

| Items                                                | Factor loadings       |                |                 |                 |                 |
|------------------------------------------------------|-----------------------|----------------|-----------------|-----------------|-----------------|
|                                                      | Unidimensional<br>CFA | Bi-factor<br>G | Bi-factor<br>F1 | Bi-factor<br>F2 | Bi-factor<br>F3 |
| I felt accepted by other kids my age.                | 0.82                  | 0.72           | 0.09            | 0.16            | 0.17            |
| I was able to count on my friends.                   | 0.88                  | 0.77           | -0.01           | -0.01           | 0.55            |
| I was able to talk about everything with my friends. | 0.83                  | 0.73           | 0.04            | 0.06            | 0.35            |
| I was good at making friends.                        | 0.81                  | 0.73           | 0.12            | 0.19            | 0.07            |
| My friends and I helped each other out.              | 0.89                  | 0.80           | 0.10            | 0.05            | 0.28            |
| Other kids wanted to be my friend.                   | 0.85                  | 0.68           | -0.01           | 0.54            | 0.03            |
| Other kids wanted to be with me.                     | 0.89                  | 0.70           | -0.01           | 0.59            | 0.00            |
| Other kids wanted to talk to me.                     | 0.87                  | 0.71           | 0.04            | 0.47            | 0.00            |
| I felt good about my friendships.                    | 0.88                  | 0.80           | 0.15            | 0.08            | 0.14            |
| I liked being around other kids my age.              | 0.80                  | 0.73           | 0.18            | 0.11            | 0.01            |
| I played alone and kept to myself.                   | 0.39                  | 0.38           | 0.14            | -0.04           | -0.01           |
| I shared with other kids (food, games, pens, etc.).  | 0.71                  | 0.62           | 0.13            | 0.21            | -0.04           |
| I spent time with my friends.                        | 0.84                  | 0.79           | 0.21            | 0.07            | 0.02            |
| I was a good friend.                                 | 0.81                  | 0.74           | 0.23            | -0.01           | 0.00            |
| I was able to have fun with my friends.              | 0.88                  | 0.83           | 0.26            | -0.05           | 0.02            |
| <b>Fit Indices</b>                                   |                       |                |                 |                 |                 |
| <b>CFA</b>                                           |                       |                |                 |                 |                 |
| Scaled CFI                                           | 0.95                  |                |                 |                 |                 |
| Scaled TLI                                           | 0.94                  |                |                 |                 |                 |
| Scaled RMSEA                                         | 0.15                  |                |                 |                 |                 |
| <b>Bi-factor</b>                                     |                       |                |                 |                 |                 |
| Omega H                                              | 0.88                  |                |                 |                 |                 |
| ECV                                                  | 0.81                  |                |                 |                 |                 |

Note: G; General factor; F1-F3, random factors.

Psychometric properties of the Patient-Reported Outcomes Measurement Information System (PROMIS®)  
Pediatric item bank Peer Relationships in the Dutch general population (Luijten et al., 2021).

## **Appendix C – Item Parameters and Item Fit Statistics**

**Appendix C.** Estimated item parameters and item fit of the pediatric PROMIS Peer Relationships item bank in the Dutch general population ( $n=527$ ).

| Item                                                 | Item Parameters and item fit statistics |           |           |           |           |                  |    | DIF   |                |
|------------------------------------------------------|-----------------------------------------|-----------|-----------|-----------|-----------|------------------|----|-------|----------------|
|                                                      | $\alpha$                                | $\beta_1$ | $\beta_2$ | $\beta_3$ | $\beta_4$ | S-X <sup>2</sup> | Df | P     | R <sup>2</sup> |
| <b>PROMIS Peer Relationships Item Bank</b>           |                                         |           |           |           |           |                  |    |       |                |
| I felt accepted by other kids my age.                | 2.82                                    | -2.79     | -2.20     | -1.22     | 0.04      | 53.52            | 37 | 0.04  | 0.011          |
| I was able to count on my friends.                   | 3.18                                    | -2.56     | -2.07     | -1.11     | 0.09      | 43.31            | 36 | 0.19  | 0.011          |
| I was able to talk about everything with my friends. | 2.58                                    | -2.69     | -1.81     | -0.73     | 0.31      | 40.68            | 43 | 0.57  | 0.014          |
| I was good at making friends.                        | 2.67                                    | -2.22     | -1.56     | -0.67     | 0.33      | 34.66            | 47 | 0.91  | 0.000          |
| My friends and I helped each other out.              | 3.72                                    | -2.82     | -2.19     | -1.10     | 0.12      | 33.64            | 31 | 0.34  | 0.003          |
| Other kids wanted to be my friend.                   | 2.50                                    | -2.41     | -1.54     | -0.27     | 0.91      | 59.54            | 47 | 0.10  | 0.001          |
| Other kids wanted to be with me.                     | 2.76                                    | -2.32     | -1.60     | -0.40     | 0.96      | 50.83            | 42 | 0.16  | 0.004          |
| Other kids wanted to talk to me.                     | 2.83                                    | -2.97     | -1.90     | -0.68     | 0.63      | 33.67            | 38 | 0.67  | 0.001          |
| I felt good about my friendships.                    | 3.57                                    | -2.56     | -1.83     | -1.12     | 0.12      | 39.59            | 34 | 0.23  | 0.000          |
| I liked being around other kids my age.              | 2.56                                    | -2.60     | -2.01     | -0.94     | 0.37      | 51.08            | 40 | 0.11  | 0.005          |
| I played alone and kept to myself.                   | 0.78                                    | -3.76     | -2.37     | -0.54     | 2.00      | 140.52           | 82 | 0.00* | 0.006          |
| I shared with other kids (food, games, pens, etc.).  | 1.96                                    | -2.78     | -1.83     | -0.66     | 0.79      | 77.36            | 53 | 0.02  | 0.000          |
| I spent time with my friends.                        | 3.02                                    | -2.37     | -1.73     | -0.75     | 0.58      | 34.97            | 38 | 0.61  | 0.000          |
| I was a good friend.                                 | 2.73                                    | -3.23     | -2.35     | -1.20     | 0.28      | 48.02            | 35 | 0.07  | 0.025^         |
| I was able to have fun with my friends.              | 3.69                                    | -2.81     | -2.27     | -1.21     | 0.02      | 27.25            | 27 | 0.45  | 0.004          |

Note: DIF; Differential item functioning between Dutch and U.S. parameters as measured by McFadden's Pseudo R<sup>2</sup> R $\alpha$ ; discrimination parameter,  $\beta_{1-4}$ ; threshold parameters, \*; Significant at  $p < 0.001$ , ^; Weak effect

Psychometric properties of the Patient-Reported Outcomes Measurement Information System (PROMIS®)  
Pediatric item bank Peer Relationships in the Dutch general population (Luijten et al., 2021).

## **Appendix D – Raw output of IRTPRO DIF Analyses**



## IRTPRO Version 4.2

Output generated by IRTPRO estimation engine Version 5.20 (64-bit)

|              |              |
|--------------|--------------|
| Project:     |              |
| Description: |              |
| Date:        | 08 June 2020 |
| Time:        | 04:35 PM     |

## Table of Contents

[Graded Model Item Parameter Estimates for Group 1, logit:  \$a\(\theta - b\)\$](#) [Summed-Score Based Item Diagnostic Tables and  \$\chi^2\$ s for Group 1](#)[Graded Model Item Parameter Estimates for Group 2, logit:  \$a\(\theta - b\)\$](#) [Summed-Score Based Item Diagnostic Tables and  \$\chi^2\$ s for Group 2](#)[Group Parameter Estimates](#)[DIF Statistics for Graded Items](#)[Marginal fit \( \$\chi^2\$ \) and Standardized LD  \$\chi^2\$  Statistics for Group 1](#)[Marginal fit \( \$\chi^2\$ \) and Standardized LD  \$\chi^2\$  Statistics for Group 2](#)[Item Information Function Values for Group 1 at 15 Values of  \$\theta\$  from -2.8 to 2.8](#)[Item Information Function Values for Group 2 at 15 Values of  \$\theta\$  from -2.8 to 2.8](#)[Likelihood-based Values and Goodness of Fit Statistics](#)[Summary of the Data and Control Parameters](#)Graded Model Item Parameter Estimates, logit:  $a\theta + c$ 

| Item | Label         | a  | s.e. | $c_1$ | s.e. | $c_2$ | s.e. | $c_3$ | s.e. | $c_4$ | s.e. |      |      |    |       |      |
|------|---------------|----|------|-------|------|-------|------|-------|------|-------|------|------|------|----|-------|------|
| 1    | P5018R1r_PEER | 5  | 2.12 | 0.10  | 1    | 4.36  | 0.14 | 2     | 3.61 | 0.12  | 3    | 1.97 | 0.08 | 4  | 0.42  | 0.06 |
| 2    | P5058R1r_PEER | 10 | 1.92 | 0.09  | 6    | 4.07  | 0.13 | 7     | 3.55 | 0.11  | 8    | 1.61 | 0.07 | 9  | 0.11  | 0.06 |
| 3    | P5056R1r_PEER | 15 | 1.71 | 0.07  | 11   | 3.54  | 0.11 | 12    | 2.72 | 0.09  | 13   | 0.76 | 0.06 | 14 | -0.50 | 0.06 |
| 4    | P1147R1r_PEER | 20 | 2.08 | 0.10  | 16   | 4.97  | 0.17 | 17    | 4.14 | 0.14  | 18   | 2.05 | 0.08 | 19 | 0.42  | 0.06 |
| 5    | P5055R1r_PEER | 25 | 2.12 | 0.10  | 21   | 5.17  | 0.19 | 22    | 4.47 | 0.16  | 23   | 2.24 | 0.09 | 24 | 0.60  | 0.06 |
| 6    | P233R2r_PEER  | 30 | 2.04 | 0.10  | 26   | 4.47  | 0.15 | 27    | 3.57 | 0.13  | 28   | 1.37 | 0.07 | 29 | -0.59 | 0.06 |
| 7    | P210R1r_PEER  | 35 | 2.37 | 0.11  | 31   | 5.36  | 0.19 | 32    | 4.31 | 0.15  | 33   | 1.58 | 0.08 | 34 | -0.51 | 0.07 |
| 8    | P9020R1r_PEER | 40 | 2.23 | 0.11  | 36   | 5.47  | 0.19 | 37    | 4.32 | 0.15  | 38   | 1.98 | 0.08 | 39 | -0.04 | 0.06 |
| 9    | P726aR2r_PEER | 45 | 1.83 | 0.12  | 41   | 4.98  | 0.22 | 42    | 4.41 | 0.19  | 43   | 2.62 | 0.12 | 44 | 1.12  | 0.08 |
| 10   | P9019r_PEER   | 50 | 1.89 | 0.12  | 46   | 4.92  | 0.22 | 47    | 4.30 | 0.18  | 48   | 2.23 | 0.11 | 49 | 0.86  | 0.08 |
| 11   | P5152R1r_PEER | 55 | 0.82 | 0.07  | 51   | 3.16  | 0.12 | 52    | 2.25 | 0.09  | 53   | 0.73 | 0.06 | 54 | -0.32 | 0.06 |
| 12   | P5150R1r_PEER | 60 | 1.28 | 0.08  | 56   | 3.44  | 0.13 | 57    | 2.84 | 0.10  | 58   | 1.09 | 0.07 | 59 | -0.26 | 0.06 |
| 13   | P5052R1r_PEER | 65 | 1.60 | 0.10  | 61   | 4.19  | 0.17 | 62    | 3.48 | 0.14  | 63   | 1.65 | 0.08 | 64 | -0.09 | 0.07 |
| 14   | P733R1r_PEER  | 70 | 1.71 | 0.11  | 66   | 5.53  | 0.25 | 67    | 5.20 | 0.23  | 68   | 3.21 | 0.13 | 69 | 1.43  | 0.09 |
| 15   | P2964R1r_PEER | 75 | 2.27 | 0.16  | 71   | 5.39  | 0.25 | 72    | 4.80 | 0.22  | 73   | 3.18 | 0.15 | 74 | 1.52  | 0.10 |

Graded Model Item Parameter Estimates for Group 1, logit:  $a(\theta - b)$  (Back to TOC)

| Item | Label         | a  | s.e. | $b_1$ | s.e.  | $b_2$ | s.e.  | $b_3$ | s.e.  | $b_4$ | s.e.  |      |
|------|---------------|----|------|-------|-------|-------|-------|-------|-------|-------|-------|------|
| 1    | P5018R1r_PEER | 5  | 2.12 | 0.10  | -2.06 | 0.07  | -1.71 | 0.06  | -0.93 | 0.04  | -0.20 | 0.03 |
| 2    | P5058R1r_PEER | 10 | 1.92 | 0.09  | -2.12 | 0.08  | -1.85 | 0.07  | -0.84 | 0.04  | -0.06 | 0.03 |
| 3    | P5056R1r_PEER | 15 | 1.71 | 0.07  | -2.07 | 0.08  | -1.59 | 0.06  | -0.45 | 0.03  | 0.29  | 0.03 |
| 4    | P1147R1r_PEER | 20 | 2.08 | 0.10  | -2.39 | 0.09  | -1.99 | 0.07  | -0.98 | 0.04  | -0.20 | 0.03 |
| 5    | P5055R1r_PEER | 25 | 2.12 | 0.10  | -2.44 | 0.09  | -2.11 | 0.08  | -1.06 | 0.04  | -0.28 | 0.03 |
| 6    | P233R2r_PEER  | 30 | 2.04 | 0.10  | -2.19 | 0.08  | -1.75 | 0.06  | -0.67 | 0.03  | 0.29  | 0.03 |
| 7    | P210R1r_PEER  | 35 | 2.37 | 0.11  | -2.26 | 0.08  | -1.82 | 0.06  | -0.67 | 0.03  | 0.22  | 0.03 |
| 8    | P9020R1r_PEER | 40 | 2.23 | 0.11  | -2.45 | 0.09  | -1.94 | 0.07  | -0.89 | 0.04  | 0.02  | 0.03 |
| 9    | P726aR2r_PEER | 45 | 1.83 | 0.12  | -2.72 | 0.14  | -2.40 | 0.12  | -1.43 | 0.07  | -0.61 | 0.04 |
| 10   | P9019r_PEER   | 50 | 1.89 | 0.12  | -2.61 | 0.14  | -2.28 | 0.11  | -1.18 | 0.06  | -0.46 | 0.04 |
| 11   | P5152R1r_PEER | 55 | 0.82 | 0.07  | -3.87 | 0.31  | -2.76 | 0.22  | -0.89 | 0.09  | 0.39  | 0.07 |
| 12   | P5150R1r_PEER | 60 | 1.28 | 0.08  | -2.69 | 0.16  | -2.22 | 0.13  | -0.85 | 0.06  | 0.20  | 0.05 |
| 13   | P5052R1r_PEER | 65 | 1.60 | 0.10  | -2.62 | 0.14  | -2.18 | 0.11  | -1.03 | 0.06  | 0.06  | 0.04 |
| 14   | P733R1r_PEER  | 70 | 1.71 | 0.11  | -3.24 | 0.18  | -3.04 | 0.16  | -1.88 | 0.09  | -0.83 | 0.05 |
| 15   | P2964R1r_PEER | 75 | 2.27 | 0.16  | -2.38 | 0.11  | -2.12 | 0.10  | -1.40 | 0.06  | -0.67 | 0.04 |

Summed-Score Based Item Diagnostic Tables and  $\chi^2$ s for Group 1 (Back to TOC)S- $\chi^2$  Item Level Diagnostic Statistics

| Item | Label         | $\chi^2$ | d.f. | Probability |
|------|---------------|----------|------|-------------|
| 1    | P5018R1r_PEER | 87.16    | 76   | 0.1791      |
| 2    | P5058R1r_PEER | 97.20    | 76   | 0.0510      |
| 3    | P5056R1r_PEER | 94.69    | 85   | 0.2210      |
| 4    | P1147R1r_PEER | 108.29   | 69   | 0.0018      |
| 5    | P5055R1r_PEER | 82.43    | 67   | 0.0968      |
| 6    | P233R2r_PEER  | 78.93    | 75   | 0.3553      |
| 7    | P210R1r_PEER  | 82.92    | 66   | 0.0777      |
| 8    | P9020R1r_PEER | 82.58    | 67   | 0.0949      |
| 9    | P726aR2r_PEER | 69.46    | 65   | 0.3291      |
| 10   | P9019r_PEER   | 69.17    | 66   | 0.3703      |
| 11   | P5152R1r_PEER | 135.96   | 91   | 0.0016      |
| 12   | P5150R1r_PEER | 79.56    | 87   | 0.7025      |
| 13   | P5052R1r_PEER | 86.48    | 75   | 0.1715      |
| 14   | P733R1r_PEER  | 108.50   | 56   | 0.0001      |
| 15   | P2964R1r_PEER | 100.85   | 62   | 0.0013      |

Graded Model Item Parameter Estimates, logit:  $a\theta + c$ 

| Item | Label         | a  | s.e. | $c_1$ | s.e. | $c_2$ | s.e. | $c_3$ | s.e. | $c_4$ | s.e. |      |      |    |      |      |
|------|---------------|----|------|-------|------|-------|------|-------|------|-------|------|------|------|----|------|------|
| 1    | P5018R1r_PEER | 80 | 3.18 | 0.25  | 76   | 8.89  | 0.68 | 77    | 7.24 | 0.50  | 78   | 4.47 | 0.31 | 79 | 0.91 | 0.19 |
| 2    | P5058R1r_PEER | 85 | 3.57 | 0.29  | 81   | 9.28  | 0.69 | 82    | 7.72 | 0.54  | 83   | 4.69 | 0.34 | 84 | 0.86 | 0.21 |

|    |               |     |      |      |     |       |      |     |      |      |     |      |      |     |       |      |
|----|---------------|-----|------|------|-----|-------|------|-----|------|------|-----|------|------|-----|-------|------|
| 3  | P5056R1r_PEER | 90  | 2.91 | 0.22 | 86  | 7.89  | 0.56 | 87  | 5.61 | 0.36 | 88  | 2.82 | 0.22 | 89  | 0.14  | 0.17 |
| 4  | P1147R1r_PEER | 95  | 3.01 | 0.22 | 91  | 6.91  | 0.45 | 92  | 5.14 | 0.32 | 93  | 2.77 | 0.22 | 94  | 0.08  | 0.17 |
| 5  | P5055R1r_PEER | 100 | 4.18 | 0.34 | 96  | 11.82 | 0.99 | 97  | 9.48 | 0.72 | 98  | 5.42 | 0.41 | 99  | 0.89  | 0.23 |
| 6  | P233R2r_PEER  | 105 | 2.81 | 0.20 | 101 | 6.91  | 0.45 | 102 | 4.75 | 0.30 | 103 | 1.57 | 0.18 | 104 | -1.36 | 0.18 |
| 7  | P210R1r_PEER  | 110 | 3.11 | 0.23 | 106 | 7.40  | 0.49 | 107 | 5.41 | 0.34 | 108 | 2.10 | 0.21 | 109 | -1.66 | 0.20 |
| 8  | P9020R1r_PEER | 115 | 3.19 | 0.24 | 111 | 9.45  | 0.75 | 112 | 6.41 | 0.41 | 113 | 2.96 | 0.24 | 114 | -0.77 | 0.18 |
| 9  | P726aR2r_PEER | 120 | 4.02 | 0.32 | 116 | 10.43 | 0.81 | 117 | 7.83 | 0.55 | 118 | 5.28 | 0.40 | 119 | 0.87  | 0.22 |
| 10 | P9019r_PEER   | 125 | 2.88 | 0.22 | 121 | 7.58  | 0.52 | 122 | 6.08 | 0.39 | 123 | 3.34 | 0.24 | 124 | -0.01 | 0.17 |
| 11 | P5152R1r_PEER | 130 | 0.88 | 0.11 | 126 | 3.24  | 0.20 | 127 | 2.14 | 0.14 | 128 | 0.71 | 0.11 | 129 | -1.29 | 0.12 |
| 12 | P5150R1r_PEER | 135 | 2.21 | 0.17 | 131 | 6.15  | 0.40 | 132 | 4.29 | 0.26 | 133 | 2.00 | 0.17 | 134 | -0.83 | 0.15 |
| 13 | P5052R1r_PEER | 140 | 3.40 | 0.26 | 136 | 8.28  | 0.57 | 137 | 6.32 | 0.41 | 138 | 3.37 | 0.26 | 139 | -0.65 | 0.19 |
| 14 | P733R1r_PEER  | 145 | 3.07 | 0.24 | 141 | 9.81  | 0.85 | 142 | 7.42 | 0.51 | 143 | 4.27 | 0.30 | 144 | 0.22  | 0.18 |
| 15 | P2964R1r_PEER | 150 | 4.15 | 0.35 | 146 | 11.69 | 0.99 | 147 | 9.70 | 0.76 | 148 | 5.80 | 0.44 | 149 | 1.28  | 0.24 |

**Graded Model Item Parameter Estimates for Group 2, logit:  $a(\theta - b)$  (Back to TOC)**

| Item | Label         | a   | s.e. | b <sub>1</sub> | s.e.  | b <sub>2</sub> | s.e.  | b <sub>3</sub> | s.e.  | b <sub>4</sub> | s.e.  |      |
|------|---------------|-----|------|----------------|-------|----------------|-------|----------------|-------|----------------|-------|------|
| 1    | P5018R1r_PEER | 80  | 3.18 | 0.25           | -2.80 | 0.19           | -2.28 | 0.13           | -1.41 | 0.07           | -0.29 | 0.05 |
| 2    | P5058R1r_PEER | 85  | 3.57 | 0.29           | -2.59 | 0.16           | -2.16 | 0.12           | -1.31 | 0.07           | -0.24 | 0.05 |
| 3    | P5056R1r_PEER | 90  | 2.91 | 0.22           | -2.71 | 0.18           | -1.93 | 0.10           | -0.97 | 0.06           | -0.05 | 0.06 |
| 4    | P1147R1r_PEER | 95  | 3.01 | 0.22           | -2.30 | 0.13           | -1.71 | 0.09           | -0.92 | 0.06           | -0.03 | 0.06 |
| 5    | P5055R1r_PEER | 100 | 4.18 | 0.34           | -2.83 | 0.19           | -2.27 | 0.12           | -1.30 | 0.06           | -0.21 | 0.05 |
| 6    | P233R2r_PEER  | 105 | 2.81 | 0.20           | -2.46 | 0.15           | -1.69 | 0.09           | -0.56 | 0.05           | 0.48  | 0.07 |
| 7    | P210R1r_PEER  | 110 | 3.11 | 0.23           | -2.38 | 0.14           | -1.74 | 0.09           | -0.68 | 0.05           | 0.53  | 0.07 |
| 8    | P9020R1r_PEER | 115 | 3.19 | 0.24           | -2.96 | 0.21           | -2.01 | 0.11           | -0.93 | 0.06           | 0.24  | 0.06 |
| 9    | P726aR2r_PEER | 120 | 4.02 | 0.32           | -2.59 | 0.16           | -1.95 | 0.10           | -1.31 | 0.06           | -0.22 | 0.05 |
| 10   | P9019r_PEER   | 125 | 2.88 | 0.22           | -2.63 | 0.17           | -2.11 | 0.12           | -1.16 | 0.06           | 0.00  | 0.06 |
| 11   | P5152R1r_PEER | 130 | 0.88 | 0.11           | -3.67 | 0.41           | -2.43 | 0.26           | -0.80 | 0.12           | 1.46  | 0.23 |
| 12   | P5150R1r_PEER | 135 | 2.21 | 0.17           | -2.79 | 0.19           | -1.95 | 0.11           | -0.91 | 0.06           | 0.38  | 0.08 |
| 13   | P5052R1r_PEER | 140 | 3.40 | 0.26           | -2.43 | 0.14           | -1.86 | 0.09           | -0.99 | 0.06           | 0.19  | 0.06 |
| 14   | P733R1r_PEER  | 145 | 3.07 | 0.24           | -3.19 | 0.26           | -2.41 | 0.14           | -1.39 | 0.07           | -0.07 | 0.06 |
| 15   | P2964R1r_PEER | 150 | 4.15 | 0.35           | -2.82 | 0.18           | -2.34 | 0.13           | -1.40 | 0.07           | -0.31 | 0.05 |

**Summed-Score Based Item Diagnostic Tables and  $\chi^2$ s for Group 2 (Back to TOC)**

**S- $\chi^2$  Item Level Diagnostic Statistics**

| Item | Label         | $\chi^2$ | d.f. | Probability |
|------|---------------|----------|------|-------------|
| 1    | P5018R1r_PEER | 52.41    | 51   | 0.4204      |
| 2    | P5058R1r_PEER | 59.95    | 48   | 0.1152      |
| 3    | P5056R1r_PEER | 75.87    | 57   | 0.0479      |
| 4    | P1147R1r_PEER | 59.64    | 65   | 0.6650      |
| 5    | P5055R1r_PEER | 46.38    | 42   | 0.2959      |
| 6    | P233R2r_PEER  | 79.64    | 65   | 0.1044      |
| 7    | P210R1r_PEER  | 78.07    | 59   | 0.0488      |
| 8    | P9020R1r_PEER | 63.48    | 54   | 0.1767      |
| 9    | P726aR2r_PEER | 55.73    | 49   | 0.2361      |
| 10   | P9019r_PEER   | 70.17    | 57   | 0.1127      |
| 11   | P5152R1r_PEER | 214.34   | 107  | 0.0001      |
| 12   | P5150R1r_PEER | 85.01    | 71   | 0.1226      |
| 13   | P5052R1r_PEER | 51.80    | 57   | 0.6707      |
| 14   | P733R1r_PEER  | 66.09    | 47   | 0.0344      |
| 15   | P2964R1r_PEER | 51.96    | 39   | 0.0799      |

**Group Parameter Estimates (Back to TOC)**

| Group | Label | $\mu$ | s.e.  | $\sigma^2$ | s.e.  | $\sigma$ | s.e.  |
|-------|-------|-------|-------|------------|-------|----------|-------|
| 1     | G0    | 0.00  | ----- | 1.00       | ----- | 1.00     | ----- |
| 2     | G1    | -0.33 | ----- | 0.79       | ----- | 0.89     | ----- |

**DIF Statistics for Graded Items (Back to TOC)**

Item numbers in:

| Group 1 | Group 2 | Total $\chi^2$ | d.f. | p      | $\chi^2_a$ | d.f. | p      | $\chi^2_{c a}$ | d.f. | p      |
|---------|---------|----------------|------|--------|------------|------|--------|----------------|------|--------|
| 1       | 1       | 90.7           | 5    | 0.0001 | 15.3       | 1    | 0.0001 | 75.4           | 4    | 0.0001 |
| 2       | 2       | 95.6           | 5    | 0.0001 | 30.8       | 1    | 0.0001 | 64.8           | 4    | 0.0001 |
| 3       | 3       | 105.8          | 5    | 0.0001 | 26.7       | 1    | 0.0001 | 79.1           | 4    | 0.0001 |
| 4       | 4       | 37.4           | 5    | 0.0001 | 14.2       | 1    | 0.0002 | 23.1           | 4    | 0.0001 |
| 5       | 5       | 81.7           | 5    | 0.0001 | 33.0       | 1    | 0.0001 | 48.7           | 4    | 0.0001 |
| 6       | 6       | 45.2           | 5    | 0.0001 | 11.2       | 1    | 0.0008 | 33.9           | 4    | 0.0001 |
| 7       | 7       | 50.0           | 5    | 0.0001 | 8.4        | 1    | 0.0037 | 41.6           | 4    | 0.0001 |
| 8       | 8       | 58.9           | 5    | 0.0001 | 13.4       | 1    | 0.0002 | 45.5           | 4    | 0.0001 |
| 9       | 9       | 89.7           | 5    | 0.0001 | 39.9       | 1    | 0.0001 | 49.8           | 4    | 0.0001 |
| 10      | 10      | 87.9           | 5    | 0.0001 | 15.8       | 1    | 0.0001 | 72.1           | 4    | 0.0001 |
| 11      | 11      | 67.1           | 5    | 0.0001 | 0.3        | 1    | 0.5969 | 66.9           | 4    | 0.0001 |
| 12      | 12      | 79.6           | 5    | 0.0001 | 25.1       | 1    | 0.0001 | 54.5           | 4    | 0.0001 |
| 13      | 13      | 81.5           | 5    | 0.0001 | 43.7       | 1    | 0.0001 | 37.8           | 4    | 0.0001 |
| 14      | 14      | 120.4          | 5    | 0.0001 | 26.3       | 1    | 0.0001 | 94.1           | 4    | 0.0001 |
| 15      | 15      | 82.6           | 5    | 0.0001 | 24.0       | 1    | 0.0001 | 58.7           | 4    | 0.0001 |

**Marginal fit ( $\chi^2$ ) and Standardized LD  $\chi^2$  Statistics for Group 1 (Back to TOC)**

| Item | Label         | Marginal $\chi^2$ | 1    | 2    | 3    | 4    | 5    | 6    | 7    | 8 | 9 | 10 |
|------|---------------|-------------------|------|------|------|------|------|------|------|---|---|----|
| 1    | P5018R1r_PEER | 4.8               |      |      |      |      |      |      |      |   |   |    |
| 2    | P5058R1r_PEER | 0.5               | 7.8  |      |      |      |      |      |      |   |   |    |
| 3    | P5056R1r_PEER | 0.1               | 8.3  | 16.1 |      |      |      |      |      |   |   |    |
| 4    | P1147R1r_PEER | 0.9               | 24.9 | 10.2 | 4.3  |      |      |      |      |   |   |    |
| 5    | P5055R1r_PEER | 3.9               | 7.4  | 17.1 | 7.2  | 2.5  |      |      |      |   |   |    |
| 6    | P233R2r_PEER  | 0.2               | 14.3 | 12.1 | 3.8  | 10.3 | 11.4 |      |      |   |   |    |
| 7    | P210R1r_PEER  | 0.2               | 24.9 | 16.6 | 10.5 | 10.9 | 4.6  | 31.7 |      |   |   |    |
| 8    | P9020R1r_PEER | 0.5               | 13.1 | 13.9 | 7.6  | 8.0  | 15.9 | 28.4 | 32.2 |   |   |    |

|    |               |     |      |      |      |     |      |      |      |     |      |     |
|----|---------------|-----|------|------|------|-----|------|------|------|-----|------|-----|
| 9  | P726aR2r_PEER | 0.7 | 2.8  | 8.3  | 3.6  | 1.4 | 5.4  | 14.0 | 6.2  | 6.8 |      |     |
| 10 | P9019r_PEER   | 2.2 | 3.5  | 9.7  | 7.2  | 1.5 | 3.8  | 4.6  | 1.8  | 1.3 | 2.2  |     |
| 11 | P5152R1r_PEER | 0.3 | 2.7  | 5.9  | 5.5  | 4.3 | 4.4  | 3.0  | 3.9  | 3.3 | 4.3  | 7.5 |
| 12 | P5150R1r_PEER | 2.5 | 2.8  | 4.8  | 2.5  | 2.2 | 10.8 | 3.1  | 2.4  | 7.3 | 6.4  | 1.5 |
| 13 | P5052R1r_PEER | 4.3 | 5.3  | 11.1 | 8.2  | 3.3 | 2.1  | 5.1  | 4.3  | 3.5 | 4.3  | 6.0 |
| 14 | P733R1r_PEER  | 1.2 | 14.6 | 17.8 | 15.4 | 3.6 | 10.3 | 7.4  | 12.8 | 8.1 | 6.0  | 3.4 |
| 15 | P2964R1r_PEER | 1.5 | 6.6  | 9.2  | 3.5  | 5.0 | 8.7  | 19.7 | 7.0  | 6.2 | 12.1 | 4.8 |

| Marginal |               | $\chi^2$ |      |     |     |
|----------|---------------|----------|------|-----|-----|
| Item     | Label         | 11       | 12   | 13  | 14  |
| 11       | P5152R1r_PEER | 0.3      |      |     |     |
| 12       | P5150R1r_PEER | 2.5      | 5.1  |     |     |
| 13       | P5052R1r_PEER | 4.3      | 11.6 | 2.2 |     |
| 14       | P733R1r_PEER  | 1.2      | 4.5  | 8.1 | 6.9 |
| 15       | P2964R1r_PEER | 1.5      | 4.4  | 4.3 | 9.8 |
|          |               |          |      |     | 8.8 |

**Marginal fit ( $\chi^2$ ) and Standardized LD  $\chi^2$  Statistics for Group 2 (Back to TOC)**

| Marginal |               | $\chi^2$ |      |      |     |     |     |      |      |     |     |
|----------|---------------|----------|------|------|-----|-----|-----|------|------|-----|-----|
| Item     | Label         | 1        | 2    | 3    | 4   | 5   | 6   | 7    | 8    | 9   | 10  |
| 1        | P5018R1r_PEER | 1.0      |      |      |     |     |     |      |      |     |     |
| 2        | P5058R1r_PEER | 1.4      | 2.9  |      |     |     |     |      |      |     |     |
| 3        | P5056R1r_PEER | 0.9      | 0.3  | 9.7  |     |     |     |      |      |     |     |
| 4        | P1147R1r_PEER | 1.0      | -0.2 | 2.4  | 5.6 |     |     |      |      |     |     |
| 5        | P5055R1r_PEER | 2.6      | 2.3  | 4.8  | 3.0 | 4.1 |     |      |      |     |     |
| 6        | P233R2r_PEER  | 0.9      | 1.8  | 3.7  | 2.6 | 3.8 | 4.1 |      |      |     |     |
| 7        | P210R1r_PEER  | 0.8      | 3.0  | 6.9  | 5.5 | 3.6 | 6.2 | 26.2 |      |     |     |
| 8        | P9020R1r_PEER | 0.7      | 2.0  | 2.9  | 0.5 | 3.9 | 3.1 | 9.8  | 20.8 |     |     |
| 9        | P726aR2r_PEER | 1.9      | 2.4  | 0.5  | 0.8 | 4.3 | 4.1 | 4.1  | 5.7  | 2.3 |     |
| 10       | P9019r_PEER   | 0.6      | 4.6  | 1.2  | 2.9 | 1.8 | 2.5 | 2.1  | 6.6  | 3.6 | 8.9 |
| 11       | P5152R1r_PEER | 0.2      | 8.1  | 10.2 | 4.5 | 7.5 | 7.2 | 9.0  | 10.9 | 8.9 | 6.9 |
| 12       | P5150R1r_PEER | 0.4      | -0.3 | 4.2  | 1.6 | 1.0 | 3.1 | 3.5  | 7.7  | 4.6 | 1.2 |
| 13       | P5052R1r_PEER | 1.2      | 1.2  | 1.6  | 4.3 | 1.3 | 1.5 | 10.9 | 4.3  | 3.4 | 3.8 |
| 14       | P733R1r_PEER  | 1.1      | 1.4  | 0.7  | 2.2 | 6.7 | 3.7 | 12.5 | 13.7 | 1.3 | 3.1 |
| 15       | P2964R1r_PEER | 2.2      | 1.0  | 2.1  | 1.0 | 6.6 | 3.1 | 11.9 | 9.4  | 3.5 | 1.7 |
|          |               |          |      |      |     |     |     |      |      |     | 4.0 |
|          |               |          |      |      |     |     |     |      |      |     | 5.7 |

| Marginal |               | $\chi^2$ |      |     |      |
|----------|---------------|----------|------|-----|------|
| Item     | Label         | 11       | 12   | 13  | 14   |
| 11       | P5152R1r_PEER | 0.2      |      |     |      |
| 12       | P5150R1r_PEER | 0.4      | 12.9 |     |      |
| 13       | P5052R1r_PEER | 1.2      | 15.1 | 6.7 |      |
| 14       | P733R1r_PEER  | 1.1      | 11.0 | 6.6 | 5.8  |
| 15       | P2964R1r_PEER | 2.2      | 11.9 | 6.3 | 3.3  |
|          |               |          |      |     | 11.5 |

**Item Information Function Values for Group 1 at 15 Values of  $\theta$  from -2.8 to 2.8 (Back to TOC)**

| Item | Label             | $\theta$ |       |       |       |       |       |       |       |       |      |      |      |      |      |      |
|------|-------------------|----------|-------|-------|-------|-------|-------|-------|-------|-------|------|------|------|------|------|------|
|      |                   | -2.8     | -2.4  | -2.0  | -1.6  | -1.2  | -0.8  | -0.4  | -0.0  | 0.4   | 0.8  | 1.2  | 1.6  | 2.0  | 2.4  | 2.8  |
| 1    | P5018R1r_PEER     | 0.64     | 1.03  | 1.31  | 1.38  | 1.38  | 1.37  | 1.32  | 1.13  | 0.78  | 0.43 | 0.21 | 0.09 | 0.04 | 0.02 | 0.01 |
| 2    | P5058R1r_PEER     | 0.63     | 0.90  | 1.07  | 1.10  | 1.10  | 1.12  | 1.10  | 1.01  | 0.78  | 0.50 | 0.28 | 0.14 | 0.07 | 0.03 | 0.02 |
| 3    | P5056R1r_PEER     | 0.52     | 0.71  | 0.85  | 0.89  | 0.87  | 0.87  | 0.89  | 0.88  | 0.79  | 0.63 | 0.43 | 0.26 | 0.14 | 0.08 | 0.04 |
| 4    | P1147R1r_PEER     | 0.94     | 1.23  | 1.31  | 1.27  | 1.28  | 1.31  | 1.27  | 1.10  | 0.76  | 0.43 | 0.21 | 0.10 | 0.04 | 0.02 | 0.01 |
| 5    | P5055R1r_PEER     | 1.01     | 1.29  | 1.33  | 1.29  | 1.32  | 1.34  | 1.29  | 1.07  | 0.70  | 0.37 | 0.18 | 0.08 | 0.03 | 0.02 | 0.01 |
| 6    | P233R2r_PEER      | 0.73     | 1.06  | 1.24  | 1.24  | 1.20  | 1.22  | 1.22  | 1.20  | 1.09  | 0.81 | 0.49 | 0.25 | 0.12 | 0.05 | 0.02 |
| 7    | P210R1r_PEER      | 0.97     | 1.47  | 1.68  | 1.57  | 1.47  | 1.57  | 1.61  | 1.59  | 1.39  | 0.91 | 0.45 | 0.20 | 0.08 | 0.03 | 0.01 |
| 8    | P9020R1r_PEER     | 1.11     | 1.43  | 1.50  | 1.42  | 1.41  | 1.45  | 1.44  | 1.36  | 1.06  | 0.63 | 0.31 | 0.14 | 0.06 | 0.02 | 0.01 |
| 9    | P726aR2r_PEER     | 0.93     | 1.01  | 1.02  | 1.02  | 1.03  | 0.99  | 0.86  | 0.64  | 0.40  | 0.22 | 0.11 | 0.06 | 0.03 | 0.01 | 0.01 |
| 10   | P9019r_PEER       | 0.93     | 1.05  | 1.05  | 1.05  | 1.07  | 1.07  | 0.98  | 0.76  | 0.50  | 0.28 | 0.14 | 0.07 | 0.03 | 0.02 | 0.01 |
| 11   | P5152R1r_PEER     | 0.21     | 0.21  | 0.21  | 0.21  | 0.21  | 0.21  | 0.21  | 0.20  | 0.19  | 0.18 | 0.16 | 0.14 | 0.11 | 0.09 | 0.07 |
| 12   | P5150R1r_PEER     | 0.45     | 0.49  | 0.50  | 0.50  | 0.50  | 0.50  | 0.50  | 0.48  | 0.44  | 0.37 | 0.28 | 0.20 | 0.14 | 0.09 | 0.05 |
| 13   | P5052R1r_PEER     | 0.68     | 0.76  | 0.78  | 0.77  | 0.77  | 0.77  | 0.76  | 0.72  | 0.62  | 0.46 | 0.31 | 0.18 | 0.10 | 0.06 | 0.03 |
| 14   | P733R1r_PEER      | 0.86     | 0.86  | 0.87  | 0.87  | 0.86  | 0.86  | 0.80  | 0.65  | 0.46  | 0.28 | 0.16 | 0.08 | 0.04 | 0.02 | 0.01 |
| 15   | P2964R1r_PEER     | 1.06     | 1.45  | 1.57  | 1.58  | 1.56  | 1.49  | 1.22  | 0.76  | 0.39  | 0.17 | 0.07 | 0.03 | 0.01 | 0.00 | 0.00 |
|      | Test Information: | 12.67    | 15.96 | 17.28 | 17.15 | 17.02 | 17.07 | 16.33 | 14.36 | 11.16 | 7.55 | 4.72 | 2.98 | 2.04 | 1.55 | 1.30 |
|      | Expected s.e.:    | 0.28     | 0.25  | 0.24  | 0.24  | 0.24  | 0.24  | 0.25  | 0.26  | 0.30  | 0.36 | 0.46 | 0.58 | 0.70 | 0.80 | 0.88 |

Marginal Reliability for Response Pattern Scores: 0.88

**Item Information Function Values for Group 2 at 15 Values of  $\theta$  from -2.8 to 2.8 (Back to TOC)**

| Item | Label             | $\theta$ |       |       |       |       |       |       |       |       |       |      |      |      |      |      |
|------|-------------------|----------|-------|-------|-------|-------|-------|-------|-------|-------|-------|------|------|------|------|------|
|      |                   | -2.8     | -2.4  | -2.0  | -1.6  | -1.2  | -0.8  | -0.4  | -0.0  | 0.4   | 0.8   | 1.2  | 1.6  | 2.0  | 2.4  | 2.8  |
| 1    | P5018R1r_PEER     | 2.80     | 2.99  | 2.67  | 2.69  | 2.51  | 2.14  | 2.57  | 2.07  | 0.92  | 0.30  | 0.09 | 0.03 | 0.01 | 0.00 | 0.00 |
| 2    | P5058R1r_PEER     | 2.89     | 3.80  | 3.43  | 3.18  | 3.27  | 2.50  | 3.13  | 2.68  | 1.07  | 0.30  | 0.07 | 0.02 | 0.00 | 0.00 | 0.00 |
| 3    | P5056R1r_PEER     | 2.18     | 2.36  | 2.39  | 2.21  | 2.26  | 2.31  | 2.22  | 2.20  | 1.43  | 0.61  | 0.21 | 0.07 | 0.02 | 0.01 | 0.00 |
| 4    | P1147R1r_PEER     | 1.35     | 2.35  | 2.68  | 2.61  | 2.52  | 2.51  | 2.37  | 2.37  | 1.54  | 0.64  | 0.21 | 0.07 | 0.02 | 0.01 | 0.00 |
| 5    | P5055R1r_PEER     | 4.74     | 4.85  | 3.73  | 3.56  | 4.32  | 2.73  | 3.95  | 3.61  | 1.16  | 0.25  | 0.05 | 0.01 | 0.00 | 0.00 | 0.00 |
| 6    | P233R2r_PEER      | 1.60     | 2.18  | 2.24  | 2.16  | 1.87  | 2.02  | 2.10  | 1.96  | 2.08  | 1.64  | 0.82 | 0.31 | 0.11 | 0.04 | 0.01 |
| 7    | P210R1r_PEER      | 1.64     | 2.61  | 2.79  | 2.57  | 2.19  | 2.51  | 2.26  | 1.95  | 2.43  | 2.05  | 0.96 | 0.33 | 0.10 | 0.03 | 0.01 |
| 8    | P9020R1r_PEER     | 2.64     | 2.48  | 2.72  | 2.29  | 2.44  | 2.60  | 2.07  | 2.42  | 2.40  | 1.25  | 0.43 | 0.13 | 0.04 | 0.01 | 0.00 |
| 9    | P726aR2r_PEER     | 3.46     | 4.33  | 4.51  | 4.33  | 4.04  | 2.62  | 3.71  | 3.37  | 1.15  | 0.26  | 0.05 | 0.01 | 0.00 | 0.00 | 0.00 |
| 10   | P9019r_PEER       | 2.06     | 2.47  | 2.35  | 2.15  | 2.25  | 1.97  | 1.92  | 2.14  | 1.53  | 0.69  | 0.25 | 0.08 | 0.03 | 0.01 | 0.00 |
| 11   | P5152R1r_PEER     | 0.24     | 0.24  | 0.24  | 0.24  | 0.24  | 0.24  | 0.23  | 0.23  | 0.23  | 0.22  | 0.22 | 0.21 | 0.19 | 0.17 | 0.14 |
| 12   | P5150R1r_PEER     | 1.33     | 1.43  | 1.43  | 1.38  | 1.37  | 1.35  | 1.25  | 1.26  | 1.27  | 0.99  | 0.59 | 0.29 | 0.13 | 0.05 | 0.02 |
| 13   | P5052R1r_PEER     | 2.02     | 3.21  | 3.36  | 3.00  | 3.00  | 2.80  | 2.13  | 2.77  | 2.57  | 1.15  | 0.35 | 0.09 | 0.02 | 0.01 | 0.00 |
| 14   | P733R1r_PEER      | 2.59     | 2.61  | 2.26  | 2.42  | 2.31  | 1.74  | 2.07  | 2.36  | 1.45  | 0.57  | 0.18 | 0.05 | 0.02 | 0.00 | 0.00 |
| 15   | P2964R1r_PEER     | 4.75     | 4.89  | 3.52  | 3.99  | 3.87  | 2.71  | 4.25  | 2.94  | 0.82  | 0.17  | 0.03 | 0.01 | 0.00 | 0.00 | 0.00 |
|      | Test Information: | 37.56    | 44.07 | 41.60 | 40.04 | 39.73 | 33.99 | 37.50 | 35.58 | 23.32 | 12.36 | 5.79 | 2.97 | 1.96 | 1.60 | 1.46 |
|      | Expected s.e.:    | 0.16     | 0.15  | 0.16  | 0.16  | 0.16  | 0.17  | 0.16  | 0.17  | 0.21  | 0.28  | 0.42 | 0.58 | 0.72 | 0.79 | 0.83 |

Marginal Reliability for Response Pattern Scores: 0.94

**Likelihood-based Values and Goodness of Fit Statistics (Back to TOC)**

|                                       |          |
|---------------------------------------|----------|
| Statistics based on the loglikelihood |          |
| -2loglikelihood:                      | 78038.29 |
| Akaike Information Criterion (AIC):   | 78338.29 |

Bayesian Information Criterion (BIC): 79348.52

Statistics based on the full item x item x ... classification

The table is too sparse to compute the general multinomial goodness of fit statistics.

Statistics based on one- and two-way marginal tables

M<sub>2</sub> statistics not available for this estimation method.

#### Summary of the Data and Control Parameters [\(Back to TOC\)](#)

| Group:               | Group 1 | Group 2 |
|----------------------|---------|---------|
| Sample Size          | 5689    | 527     |
| Number of Items      | 15      | 15      |
| Number of Dimensions | 1       | 1       |

#### Group 1

| Item | Label         | Categories | Model  |
|------|---------------|------------|--------|
| 1    | P5018R1r_PEER | 5          | Graded |
| 2    | P5058R1r_PEER | 5          | Graded |
| 3    | P5056R1r_PEER | 5          | Graded |
| 4    | P1147R1r_PEER | 5          | Graded |
| 5    | P5055R1r_PEER | 5          | Graded |
| 6    | P233R2r_PEER  | 5          | Graded |
| 7    | P210R1r_PEER  | 5          | Graded |
| 8    | P9020R1r_PEER | 5          | Graded |
| 9    | P726aR2r_PEER | 5          | Graded |
| 10   | P9019r_PEER   | 5          | Graded |
| 11   | P5152R1r_PEER | 5          | Graded |
| 12   | P5150R1r_PEER | 5          | Graded |
| 13   | P5052R1r_PEER | 5          | Graded |
| 14   | P733R1r_PEER  | 5          | Graded |
| 15   | P2964R1r_PEER | 5          | Graded |

#### Group 2

| Item | Label         | Categories | Model  |
|------|---------------|------------|--------|
| 1    | P5018R1r_PEER | 5          | Graded |
| 2    | P5058R1r_PEER | 5          | Graded |
| 3    | P5056R1r_PEER | 5          | Graded |
| 4    | P1147R1r_PEER | 5          | Graded |
| 5    | P5055R1r_PEER | 5          | Graded |
| 6    | P233R2r_PEER  | 5          | Graded |
| 7    | P210R1r_PEER  | 5          | Graded |
| 8    | P9020R1r_PEER | 5          | Graded |
| 9    | P726aR2r_PEER | 5          | Graded |
| 10   | P9019r_PEER   | 5          | Graded |
| 11   | P5152R1r_PEER | 5          | Graded |
| 12   | P5150R1r_PEER | 5          | Graded |
| 13   | P5052R1r_PEER | 5          | Graded |
| 14   | P733R1r_PEER  | 5          | Graded |
| 15   | P2964R1r_PEER | 5          | Graded |

#### Parameter Estimation Control Values

|                                              |                 |
|----------------------------------------------|-----------------|
| Bock-Aitkin EM Algorithm                     |                 |
| Maximum number of cycles:                    | 500             |
| Convergence criterion:                       | 1.00e-005       |
| Maximum number of M-step iterations:         | 50              |
| Convergence criterion for iterative M-steps: | 1.00e-006       |
| Number of rectangular quadrature points:     | 49              |
| Minimum, Maximum quadrature points:          | -6.00 6.00      |
| SEM algorithm tolerance:                     | 1.00e-003       |
| Standard error computation algorithm:        | Supplemented EM |

#### DIF Analysis

All items are evaluated for DIF  
(Conditional on population distribution estimates obtained with all items constrained equal)

#### Contrasts among groups:

| Group:     | 1     | 2      |
|------------|-------|--------|
| Contrast 1 | 1.000 | -1.000 |

#### Miscellaneous Control Values

|                                     |           |
|-------------------------------------|-----------|
| Print parameter numbers?            | Yes       |
| Z tolerance, max. abs. logit value: | 50.00     |
| Number of processor cores used:     | 8         |
| Number of cycles completed:         | 221       |
| Maximum parameter change:           | 0.00e+000 |
| Number of free parameters:          | 150       |

#### Processing times (in seconds)

|                              |      |
|------------------------------|------|
| E-step computations:         | 0.28 |
| M-step computations:         | 0.21 |
| Standard error computations: | 1.38 |
| Goodness-of-fit statistics:  | 0.08 |
| Total:                       | 1.95 |

#### Output Files

HTML results and control parameters: C:\AMC Werk\IRT PRO\PeerrelDIFvoorIRTPRO-ReverseGroupCoding\_Test1-irt.htm

#### Convergence and Numerical Stability

|                                         |                                      |
|-----------------------------------------|--------------------------------------|
| Engine status:                          | Normal termination                   |
| SEM algorithm status:                   | Normal                               |
| First-order test:                       | Convergence criteria satisfied       |
| Condition number of information matrix: | 1.58e+003                            |
| Second-order test:                      | Solution is a possible local maximum |
